# Supplementary material for: CD69 expression potentially predicts response to bendamustine and its modulation by ibrutinib or idelalisib enhances cytotoxic effect in chronic lymphocytic leukemia
Source: PubMed Central journal article supplement (PMC4868702; doi:10.18632/oncotarget.6685), 2015-12-19
Supplement: oncotarget-07-5507-s001.pdf [file oncotarget-07-5507-s001.pdf]

# CD69 expression potentially predicts response to bendamustine and its modulation by ibrutinib or idelalisib enhances cytotoxic effect in chronic lymphocytic leukemia

## Supplementary Material

**Supplemental table 1:** Detailed clinical and biological characteristics of CLL patients included in the study.

| Patient | Micro arrays cohort (n=38) | qRT-PCR cohort (n=77) | Gender/ Age at diagnosis | a % Tumoral cells | b Binet/ Rai stage | Treatment lines | c IGVH | d ZAP-70 | d CD38 | d CD49d | e Cyto-genetics  | f Recurrent mutations               | % Cytotoxicity bendamustine 25 µM (24 h) |
|---------|----------------------------|-----------------------|--------------------------|-------------------|--------------------|-----------------|--------|----------|--------|---------|------------------|-------------------------------------|------------------------------------------|
| CLL 01  | Y                          |                       | M/49                     | 90                | A/I                | 0               | um     | -        | -      | ND      | N                | <i>SF3B1, DAPK1</i>                 | 46.83                                    |
| CLL 02  | Y                          |                       | F/59                     | 95                | A/0                | 0               | um     | +        | +      | ND      | N                | <i>NOTCH1, MGA, CCND2, XPO1</i>     | 35.26                                    |
| CLL 03  | Y                          |                       | M/63                     | 95                | C/IV               | ND              | um     | +        | +      | ND      | 13q del          | <i>TP53, ASXL1</i>                  | 31.6                                     |
| CLL 04  | Y                          | Y                     | M/44                     | 98                | A/I                | 0               | um     | -        | -      | +       | 13q del          | <i>ZNF292, CNOT3</i>                | 12.8                                     |
| CLL 05  | Y                          | Y                     | M/70                     | 95                | B/II               | 0               | um     | -        | -      | -       | 13q del          | <i>ATM, SF3B1</i>                   | 37.5                                     |
| CLL 06  | Y                          | Y                     | M/55                     | 96                | B/II               | 0               | um     | -        | -      | ND      | N                | <i>NOTCH1, RPS15, SETD1A, SETD2</i> | 49.5                                     |
| CLL 07  | Y                          | Y                     | M/59                     | 95                | A/0                | 0               | ND     | +        | -      | +       | N                | <i>ATM, ZNF292, ZMYM3, NFKBIE</i>   | 18.2                                     |
| CLL 08  | Y                          | Y                     | M/58                     | 88                | B/II               | 0               | um     | -        | -      | -       | 13q del          | <i>BRAF, MGA, ATRX</i>              | 79.2                                     |
| CLL 09  | Y                          | Y                     | F/52                     | 95                | B/II               | 0               | m      | -        | -      | ND      | 13q del          |                                     | 11.1                                     |
| CLL 10  | Y                          | Y                     | M/56                     | 94                | A/0                | 0               | um     | +        | +      | +       | 13q del          | <i>SF3B1, XPO1</i>                  | 29.8                                     |
| CLL 11  | Y                          | Y                     | M/64                     | 93                | A/0                | 0               | m      | -        | -      | -       | trisomy12        | <i>NF-KB2(del)</i>                  | 17.9                                     |
| CLL 12  | Y                          | Y                     | M/49                     | 94                | A/0                | 0               | um     | +        | +      | ND      | N                | <i>BRAF, SRSF1</i>                  | 17.1                                     |
| CLL 13  | Y                          | Y                     | M/46                     | 96                | A/I                | 0               | um     | -        | +      | -       | 11q del          | <i>ATM</i>                          | 24.6                                     |
| CLL 14  | Y                          | Y                     | F/77                     | 92                | B/II               | 0               | um     | +        | +      | -       | 11q del, 13q del | <i>NOTCH, BIRC, ZNF292, MGA</i>     | 22.6                                     |
| CLL 15  | Y                          | Y                     | M/53                     | 91                | A/0                | 0               | m      | -        | -      | -       | N                |                                     | 30.5                                     |
| CLL 16  | Y                          | Y                     | F/62                     | 96                | A/0                | 0               | m      | -        | -      | -       | 13q del          |                                     | 27.4                                     |
| CLL 17  | Y                          | Y                     | M/49                     | 96                | C/IV               | 0               | m      | -        | -      | -       | 13q del          | <i>CHD2, MYD88</i>                  | 37.9                                     |
| CLL 18  | Y                          | Y                     | M/73                     | 95                | C/III              | 0               | um     | -        | +      | +       | 13q del          | <i>ATM, SF3B1, ASXL1</i>            | 4.9                                      |
| CLL 19  | Y                          | Y                     | M/70                     | 96                | C/III              | 0               | um     | +        | -      | -       | 13q del          | <i>POT1</i>                         | 22.8                                     |
| CLL 20  | Y                          | Y                     | M/71                     | 97                | A/0                | 0               | um     | -        | -      | +       | N                | <i>FUBP1, XPO1, RPS15</i>           | 39.5                                     |
| CLL 21  | Y                          | Y                     | M/64                     | 97                | A/0                | 0               | m      | -        | -      | -       | 13q del          | <i>CHD2, SRSF1</i>                  | 42.7                                     |
| CLL 22  | Y                          | Y                     | M/61                     | 96                | C/III              | 0               | um     | -        | -      | -       | 11q del          | <i>BIRC3(del), MED12</i>            | 22.4                                     |
| CLL 23  | Y                          | Y                     | F/68                     | 96                | A/0                | 0               | m      | -        | -      | -       | 13q del          | <i>TLR2</i>                         | 44.6                                     |
| CLL 24  | Y                          | Y                     | F/75                     | 87                | B/II               | 0               | um     | +        | -      | +       | trisomy12        |                                     | 40.4                                     |
| CLL 25  | Y                          | Y                     | M/56                     | 92                | A/0                | 0               | m      | -        | -      | -       | N                |                                     | 28.5                                     |
| CLL 26  | Y                          | Y                     | F/71                     | 83                | A/0                | 0               | um     | +        | -      | -       | 13q del          |                                     | 43.6                                     |

|        |   |   |      |    |       |   |    |   |   |    |                     |                                     |      |
|--------|---|---|------|----|-------|---|----|---|---|----|---------------------|-------------------------------------|------|
| CLL 27 | Y | Y | M/78 | 94 | A/II  | 0 | um | - | - | +  | 13q del             | 23.2                                |      |
| CLL 28 | Y | Y | M/60 | 91 | A/0   | 0 | um | + | - | -  | N                   | 19.9                                |      |
| CLL 29 | Y | Y | F/43 | 95 | A/0   | 0 | m  | + | - | -  | 13q del             | 44.5                                |      |
| CLL 30 | Y | Y | M/44 | 97 | B/II  | 0 | um | - | - | -  | 13q del             | <i>XPO1</i>                         | 8.3  |
| CLL 31 | Y | Y | F/48 | 91 | A/0   | 0 | m  | - | - | -  | 13q del             | 42.3                                |      |
| CLL 32 | Y | Y | M/78 | 95 | A/0   | 0 | m  | - | + | -  | trisomy12           | <i>NFKB2(del)</i>                   | 8.1  |
| CLL 33 | Y | Y | M/80 | 96 | A/0   | 0 | m  | - | - | -  | N                   | 35.1                                |      |
| CLL 34 | Y | Y | M/68 | 93 | A/0   | 0 | m  | - | - | +  | 17p del             | <i>TP53</i>                         | 12.5 |
| CLL 35 | Y | Y | F/52 | 92 | B/II  | 0 | m  | - | - | ND | trisomy12           | 42.2                                |      |
| CLL 36 | Y | Y | M/54 | 96 | B/II  | 0 | m  | + | - | -  | 13q del             | 16.8                                |      |
| CLL 37 | Y | Y | M/57 | 98 | A/0   | 0 | m  | - | + | -  | 13q del             | 51.1                                |      |
| CLL 38 | Y | Y | M/41 | 89 | A/0   | 0 | m  | - | - | -  | 13q del             | <i>ZFHX3</i>                        | 30   |
| CLL 39 |   | Y | M/58 | 95 | A/0   | 0 | m  | - | - | -  | N                   | <i>AHNAK, ZMYM3</i>                 | 19.9 |
| CLL 40 |   | Y | F/66 | 78 | A/0   | 0 | m  | - | - | +  | 13q del             | 41.8                                |      |
| CLL 41 |   | Y | M/45 | 95 | C/IV  | 0 | m  | - | - | ND | 13q del             | <i>MYD88, KLHL6</i>                 | 50.6 |
| CLL 42 |   | Y | M/37 | 64 | A/I   | 1 | m  | - | - | ND | 13q del             | <i>TP53, CHD2</i>                   | 9.2  |
| CLL 43 |   | Y | F/53 | 94 | B/II  | 1 | um | + | - | -  | 13q del,<br>11q del | <i>SF3B1, POT1, IKZF3</i>           | 20.8 |
| CLL 44 |   | Y | F/60 | 86 | C/III | 0 | m  | + | + | ND | 13q del             | 42.5                                |      |
| CLL 45 |   | Y | M/51 | 81 | A/0   | 0 | m  | - | - | ND | 13q del,<br>11q del | <i>BIRC3, NXFI</i>                  | 13.3 |
| CLL 46 |   | Y | M/53 | 97 | C/IV  | 1 | um | + | + | +  | 13q del             | <i>ZNF292, POT1</i>                 | 0    |
| CLL 47 |   | Y | M/52 | 97 | A/II  | 2 | um | - | + | -  | 11q del             | <i>ARID1A, ATM</i>                  | 66.1 |
| CLL 48 |   | Y | M/51 | 97 | B/II  | 1 | um | + | + | -  | 13q del             | 27.9                                |      |
| CLL 49 |   | Y | M/52 | 99 | B/I   | 0 | um | + | - | ND | 17p del             | 10.9                                |      |
| CLL 50 |   | Y | F/45 | 86 | B/II  | 1 | um | + | + | +  | trisomy12           | <i>NOTCH1, TP53,<br/>EGR2, NFX1</i> | 27.7 |
| CLL 51 |   | Y | M/56 | 99 | B/II  | 4 | m  | - | + | ND | 13q del,<br>11q del | 1.1                                 |      |
| CLL 52 |   | Y | M/62 | 99 | C/IV  | 1 | m  | - | - | +  | 13q del             | 4.7                                 |      |
| CLL 53 |   | Y | M/46 | 93 | A/I   | 1 | um | - | + | +  | 11q del             | <i>ATM</i>                          | 18.5 |
| CLL 54 |   | Y | M/44 | 96 | C/IV  | 0 | m  | - | - | ND | 13q del             | 20.9                                |      |
| CLL 55 |   | Y | M/66 | 95 | C/IV  | 0 | m  | - | - | -  | 13q del             | 30.5                                |      |
| CLL 56 |   | Y | M/48 | 92 | A/0   | 0 | m  | - | - | -  | N                   | 38.1                                |      |
| CLL 57 |   | Y | F/44 | 95 | A/0   | 0 | m  | - | - | -  | N                   | 18.3                                |      |
| CLL 58 |   | Y | M/67 | 99 | A/0   | 0 | m  | - | - | -  | N                   | <i>CHD2</i>                         | 21.5 |
| CLL 59 |   | Y | M/65 | 94 | A/I   | 0 | um | + | - | -  | 13q del             | 12.4                                |      |
| CLL 60 |   | Y | M/68 | 95 | B/II  | 0 | um | - | - | -  | 13q del             | <i>DDX3X</i>                        | 0    |
| CLL 61 |   | Y | M/58 | 93 | A/I   | 0 | m  | - | - | -  | N                   | <i>PTPN11</i>                       | 19.2 |
| CLL 62 |   | Y | F/72 | 80 | A/0   | 0 | m  | - | - | +  | 13q del             | 40.8                                |      |
| CLL 63 |   | Y | M/56 | 93 | A/0   | 0 | m  | - | - | -  | N                   | 52.8                                |      |
| CLL 64 |   | Y | M/61 | 93 | A/0   | 0 | m  | - | - | -  | N                   | 35.1                                |      |
| CLL 65 |   | Y | M/73 | 72 | A/0   | 0 | m  | - | - | -  | trisomy12           | <i>CCND2</i>                        | 33.4 |
| CLL 66 |   | Y | F/49 | 94 | A/I   | 0 | m  | - | - | -  | 13q del             | 27.8                                |      |

|        |   |      |    |       |   |    |    |    |    |                       |                                         |      |
|--------|---|------|----|-------|---|----|----|----|----|-----------------------|-----------------------------------------|------|
| CLL 67 | Y | F/49 | ND | A/I   | 0 | m  | ND | ND | ND | 13q del               |                                         | 48   |
| CLL 68 | Y | M/66 | 94 | A/0   | 0 | m  | -  | -  | -  | trisomy12,<br>13q del | <i>CHD2, KLHL6</i>                      | 22.6 |
| CLL 69 | Y | M/62 | 97 | B/II  | 0 | um | -  | -  | -  | 13q del,<br>11q del   | <i>BIRC3(del), ATR</i>                  | 56.5 |
| CLL 70 | Y | M/63 | 97 | A/I   | 2 | um | +  | -  | ND | 13q del               |                                         | 5.5  |
| CLL 71 | Y | M/63 | 85 | A/0   | 0 | m  | -  | -  | -  | N                     |                                         | 41   |
| CLL 72 | Y | M/69 | 98 | A/0   | 0 | m  | -  | -  | -  | N                     |                                         | 47.9 |
| CLL 73 | Y | F/69 | 98 | A/0   | 1 | m  | -  | -  | -  | N                     | <i>CHD2</i>                             | 18.5 |
| CLL 74 | Y | F/52 | 85 | A/0   | 0 | m  | -  | -  | ND | trisomy12             |                                         | 23.3 |
| CLL 75 | Y | M/54 | 95 | A/I   | 0 | m  | +  | -  | ND | 13q del               |                                         | 8.3  |
| CLL 76 | Y | M/62 | 95 | A/0   | 0 | um | +  | +  | ND | N                     | <i>ATM, NOTCH, BIRC3,<br/>CHD2, MGA</i> | 42.7 |
| CLL 77 | Y | M/66 | 98 | B/III | 0 | um | -  | +  | -  | 11q del               | <i>ATM, BIRC3(del)</i>                  | 3.1  |
| CLL 78 | Y | F/65 | 86 | A/0   | 0 | m  | -  | -  | -  | 13q del               |                                         | 37.3 |
| CLL 79 | Y | M/67 | 94 | A/0   | 0 | m  | -  | -  | -  | 13q del               | <i>CNOT3</i>                            | 7.1  |
| CLL 80 | Y | F/54 | 92 | B/II  | 0 | m  | -  | -  | +  | N                     |                                         | 14.1 |

Abbreviations: Y, yes; M, male; F, female; ND, not determined m, mutated; um, unmutated; N, normal; del, deletion; BDM, bendamustine.

a Percentage of tumoral cells was quantified by flow cytometry labeling of CD5+/CD19+ cells and light chain restriction.

b According to Rai and Binet's classification: Early (Rai 0, Binet A), intermediate (Rai I/II, Binet B) and advanced (Rai III/IV, Binet C) stage disease.

c IGVH gene was sequenced after PCR amplification, and aligned to NCBI IgBlast. Mutated status was assigned when >2% deviation from germline IGVH sequence was present.

d Expression levels of ZAP-70, CD38 and CD49d were determined by flow cytometry with conjugated antibodies. Cut-off considered for positivity was >20%, >30% and >30%, respectively.

e Cytogenetic alterations were assessed by FISH.

f Recurrent mutations were identified by exome-sequencing analysis within the ICGC project.

**Supplemental table 2:** List of DEGs between bendamustine-resistant and bendamustine-sensitive CLL cases obtained by a Rank Products analysis using an FDR<0.001 and a FC >1.5.

**Downregulated in resistant cases**

| Gene             | Fold-change BDM-Resistant vs BDM-Sensitive | Gene             | Fold-change BDM-Resistant vs BDM-Sensitive | Gene              | Fold-change BDM-Resistant vs BDM-Sensitive | Gene             | Fold-change BDM-Resistant vs BDM-Sensitive | Gene            | Fold-change BDM-Resistant vs BDM-Sensitive |
|------------------|--------------------------------------------|------------------|--------------------------------------------|-------------------|--------------------------------------------|------------------|--------------------------------------------|-----------------|--------------------------------------------|
| <i>NTN3</i>      | -1.504                                     | <i>CTLA4</i>     | -1.657                                     | <i>HSPA1A</i>     | -1.760                                     | <i>CCDC88A</i>   | -1.837                                     | <i>SYTL2</i>    | -1.901                                     |
| <i>C5orf32</i>   | -1.511                                     | <i>HSBP1L1</i>   | -1.661                                     | <i>KCTD7</i>      | -1.761                                     | <i>SLAMF1</i>    | -1.838                                     | <i>UTS2</i>     | -1.903                                     |
| <i>LY86</i>      | -1.512                                     | <i>ANK1</i>      | -1.665                                     | <i>GLUL</i>       | -1.772                                     | <i>SIPA1L1</i>   | -1.839                                     | <i>DEF8</i>     | -1.907                                     |
| <i>CREM</i>      | -1.528                                     | <i>SATB1</i>     | -1.670                                     | <i>ATM</i>        | -1.773                                     | <i>RASGRP1</i>   | -1.844                                     | <i>RAD51L1</i>  | -1.908                                     |
| <i>C21orf7</i>   | -1.544                                     | <i>PRPF4</i>     | -1.674                                     | <i>CCNG2</i>      | -1.775                                     | <i>PPP4R2</i>    | -1.854                                     | <i>ATF5</i>     | -1.911                                     |
| <i>KLF7</i>      | -1.547                                     | <i>DUSP22</i>    | -1.675                                     | <i>GOLPH3L</i>    | -1.779                                     | <i>RAD51C</i>    | -1.856                                     | <i>SELP</i>     | -1.913                                     |
| <i>MAP3K8</i>    | -1.551                                     | <i>HSPA1A</i>    | -1.675                                     | <i>NCRNA00171</i> | -1.788                                     | <i>PAIP2B</i>    | -1.858                                     | <i>HERC4</i>    | -1.914                                     |
| <i>EGR3</i>      | -1.554                                     | <i>ADARB1</i>    | -1.676                                     | <i>OSGEPL1</i>    | -1.788                                     | <i>ANKFY1</i>    | -1.860                                     | <i>GSPT1</i>    | -1.915                                     |
| <i>CD86</i>      | -1.570                                     | <i>VPS37B</i>    | -1.686                                     | <i>COL4A3</i>     | -1.789                                     | <i>C11orf61</i>  | -1.860                                     | <i>FBXO15</i>   | -1.918                                     |
| <i>SERPINB6</i>  | -1.585                                     | <i>ESYT2</i>     | -1.690                                     | <i>SLC37A4</i>    | -1.790                                     | <i>KLHDC5</i>    | -1.860                                     | <i>GLYATL2</i>  | -1.919                                     |
| <i>COBLL1</i>    | -1.590                                     | <i>IGLL5</i>     | -1.700                                     | <i>CD22</i>       | -1.791                                     | <i>PHF23</i>     | -1.861                                     | <i>ZNF594</i>   | -1.920                                     |
| <i>SYNJ2</i>     | -1.596                                     | <i>PPP1R10</i>   | -1.704                                     | <i>SLC4A7</i>     | -1.792                                     | <i>C18orf1</i>   | -1.863                                     | <i>TUBB1</i>    | -1.921                                     |
| <i>IGF2BP3</i>   | -1.606                                     | <i>MAP4K3</i>    | -1.705                                     | <i>SKI</i>        | -1.795                                     | <i>TBXA2R</i>    | -1.864                                     | <i>IL2RB</i>    | -1.922                                     |
| <i>HIST1H2BD</i> | -1.611                                     | <i>PTCH1</i>     | -1.708                                     | <i>BCL2</i>       | -1.801                                     | <i>TCTN1</i>     | -1.864                                     | <i>SPIN4</i>    | -1.923                                     |
| <i>SLC7A1</i>    | -1.611                                     | <i>ZNF429</i>    | -1.709                                     | <i>LEPROTL1</i>   | -1.804                                     | <i>PGBD2</i>     | -1.865                                     | <i>FAM65B</i>   | -1.926                                     |
| <i>RHOBTB2</i>   | -1.615                                     | <i>ANXA4</i>     | -1.727                                     | <i>TTC33</i>      | -1.806                                     | <i>TSHZ2</i>     | -1.868                                     | <i>GPT2</i>     | -1.926                                     |
| <i>TRIM7</i>     | -1.616                                     | <i>BCAR3</i>     | -1.739                                     | <i>SOS1</i>       | -1.811                                     | <i>NFATC1</i>    | -1.869                                     | <i>SGK223</i>   | -1.927                                     |
| <i>ZBTB1</i>     | -1.618                                     | <i>BATF</i>      | -1.740                                     | <i>SLAMF6</i>     | -1.815                                     | <i>TAF4</i>      | -1.872                                     | <i>PTPRS</i>    | -1.929                                     |
| <i>ZADH2</i>     | -1.628                                     | <i>PPP2CB</i>    | -1.742                                     | <i>ZNF404</i>     | -1.820                                     | <i>ZFP3</i>      | -1.876                                     | <i>IGJ</i>      | -1.931                                     |
| <i>WNT3</i>      | -1.631                                     | <i>SH3PXD2A</i>  | -1.747                                     | <i>SMA4</i>       | -1.821                                     | <i>HSPH1</i>     | -1.878                                     | <i>SLCO4A1</i>  | -1.932                                     |
| <i>PYHIN1</i>    | -1.632                                     | <i>ANKRD20A5</i> | -1.747                                     | <i>SLC16A3</i>    | -1.823                                     | <i>HOMER3</i>    | -1.885                                     | <i>C17orf87</i> | -1.934                                     |
| <i>PNMA2</i>     | -1.642                                     | <i>RAPGEF5</i>   | -1.749                                     | <i>APBB2</i>      | -1.826                                     | <i>PLGLA</i>     | -1.887                                     | <i>PDCD6IP</i>  | -1.937                                     |
| <i>SESTD1</i>    | -1.643                                     | <i>MRC2</i>      | -1.752                                     | <i>ELP3</i>       | -1.832                                     | <i>C20orf195</i> | -1.890                                     | <i>C2orf88</i>  | -1.937                                     |
| <i>HSPA1B</i>    | -1.650                                     | <i>POPDC2</i>    | -1.757                                     | <i>STK38</i>      | -1.837                                     | <i>PAQR8</i>     | -1.892                                     | <i>TRAK2</i>    | -1.938                                     |
| <i>MAP2K6</i>    | -1.650                                     | <i>TTC28</i>     | -1.757                                     | <i>SLC35B3</i>    | -1.837                                     | <i>FCER2</i>     | -1.896                                     | <i>NBPF1</i>    | -1.939                                     |
| <i>MAP4K4</i>    | -1.657                                     | <i>FGFR1</i>     | -1.758                                     | <i>COL4A4</i>     | -1.837                                     | <i>ZNF232</i>    | -1.899                                     | <i>C10orf26</i> | -1.942                                     |

| Gene            | Fold-change<br>BDM-Resistant<br>vs BDM-<br>Sensitive | Gene            | Fold-change<br>BDM-Resistant<br>vs BDM-<br>Sensitive | Gene            | Fold-change<br>BDM-Resistant<br>vs BDM-<br>Sensitive | Gene            | Fold-change<br>BDM-Resistant<br>vs BDM-<br>Sensitive |
|-----------------|------------------------------------------------------|-----------------|------------------------------------------------------|-----------------|------------------------------------------------------|-----------------|------------------------------------------------------|
| <i>PDGFD</i>    | -1.944                                               | <i>PTH2R</i>    | -2.069                                               | <i>SIK2</i>     | -2.275                                               | <i>UBASH3B</i>  | -2.480                                               |
| <i>PITPNC1</i>  | -1.946                                               | <i>ARMCX2</i>   | -2.069                                               | <i>CDC14B</i>   | -2.277                                               | <i>COL9A3</i>   | -2.487                                               |
| <i>C3orf26</i>  | -1.947                                               | <i>TCL1A</i>    | -2.072                                               | <i>PRDM15</i>   | -2.279                                               | <i>TXNDC5</i>   | -2.500                                               |
| <i>ITPKB</i>    | -1.957                                               | <i>ZNF540</i>   | -2.077                                               | <i>PDE8A</i>    | -2.279                                               | <i>CRIP3</i>    | -2.524                                               |
| <i>DIDO1</i>    | -1.958                                               | <i>KCNH8</i>    | -2.081                                               | <i>IL4R</i>     | -2.283                                               | <i>RASSF6</i>   | -2.549                                               |
| <i>SLC15A2</i>  | -1.960                                               | <i>KRT18</i>    | -2.088                                               | <i>RFTN1</i>    | -2.284                                               | <i>FCRL2</i>    | -2.583                                               |
| <i>ITGB1</i>    | -1.962                                               | <i>VIPR1</i>    | -2.096                                               | <i>PDE4A</i>    | -2.301                                               | <i>HLA-DRB4</i> | -2.608                                               |
| <i>TOR1B</i>    | -1.964                                               | <i>UBN2</i>     | -2.103                                               | <i>KLHL6</i>    | -2.311                                               | <i>SOBP</i>     | -2.623                                               |
| <i>KIAA0649</i> | -1.972                                               | <i>SEC63</i>    | -2.107                                               | <i>TCF4</i>     | -2.331                                               | <i>LHFPL2</i>   | -2.629                                               |
| <i>SYNE2</i>    | -1.975                                               | <i>RNF144B</i>  | -2.129                                               | <i>NAPEPLD</i>  | -2.340                                               | <i>PTK2</i>     | -2.646                                               |
| <i>C17orf80</i> | -1.984                                               | <i>SLC4A8</i>   | -2.137                                               | <i>USP44</i>    | -2.341                                               | <i>SYT17</i>    | -2.664                                               |
| <i>APPBP2</i>   | -1.987                                               | <i>VASH1</i>    | -2.144                                               | <i>PPBP</i>     | -2.353                                               | <i>MYBL1</i>    | -2.689                                               |
| <i>PIGR</i>     | -1.995                                               | <i>TRD@</i>     | -2.145                                               | <i>SEMA4A</i>   | -2.361                                               | <i>TRAC</i>     | -2.720                                               |
| <i>CD200</i>    | -1.996                                               | <i>PROSC</i>    | -2.147                                               | <i>FMOD</i>     | -2.365                                               | <i>PPAPDC1B</i> | -2.871                                               |
| <i>ROCK2</i>    | -1.997                                               | <i>DPYSL2</i>   | -2.148                                               | <i>LCK</i>      | -2.374                                               | <i>FCRL1</i>    | -2.930                                               |
| <i>ZCCHC18</i>  | -2.000                                               | <i>PASK</i>     | -2.152                                               | <i>HOXB2</i>    | -2.376                                               | <i>NBPF3</i>    | -2.965                                               |
| <i>EPM2AIP1</i> | -2.012                                               | <i>DNAJB6</i>   | -2.177                                               | <i>PGM2L1</i>   | -2.376                                               | <i>FCRL5</i>    | -2.980                                               |
| <i>FILIP1L</i>  | -2.021                                               | <i>LRRC32</i>   | -2.179                                               | <i>BACE2</i>    | -2.381                                               | <i>TGFBI</i>    | -2.995                                               |
| <i>ZNF137P</i>  | -2.024                                               | <i>WNT10A</i>   | -2.220                                               | <i>APOD</i>     | -2.381                                               | <i>XIST</i>     | -3.442                                               |
| <i>SLC25A19</i> | -2.028                                               | <i>ORMDL1</i>   | -2.220                                               | <i>MEF2C</i>    | -2.396                                               | <i>KIAA0802</i> | -3.834                                               |
| <i>ANKH</i>     | -2.031                                               | <i>ATP1B1</i>   | -2.222                                               | <i>TNFRSF17</i> | -2.397                                               | <i>SDK2</i>     | -3.857                                               |
| <i>QSER1</i>    | -2.041                                               | <i>C11orf73</i> | -2.223                                               | <i>GTF2H1</i>   | -2.406                                               | <i>P2RY14</i>   | -4.171                                               |
| <i>DHX32</i>    | -2.041                                               | <i>IKZF2</i>    | -2.234                                               | <i>ADAM29</i>   | -2.429                                               | <i>COCH</i>     | -4.358                                               |
| <i>HVCN1</i>    | -2.042                                               | <i>PLGLB2</i>   | -2.244                                               | <i>ATP10D</i>   | -2.430                                               | <i>CNTNAP2</i>  | -4.564                                               |
| <i>PF4</i>      | -2.063                                               | <i>PLGLB1</i>   | -2.252                                               | <i>PTPLA</i>    | -2.457                                               | <i>TCF7</i>     | -4.733                                               |
| <i>LPAR5</i>    | -2.064                                               | <i>GTSF1L</i>   | -2.268                                               | <i>HRK</i>      | -2.467                                               | <i>FCRL3</i>    | -4.873                                               |
| <i>C5orf53</i>  | -2.068                                               | <i>PHTF1</i>    | -2.270                                               | <i>TREML2</i>   | -2.467                                               | <i>HLA-DPB1</i> | -5.342                                               |

## Upregulated in resistant cases

| Gene             | Fold-change<br>BDM-Resistant<br>vs BDM-<br>Sensitive | Gene             | Fold-change<br>BDM-Resistant<br>vs BDM-<br>Sensitive | Gene            | Fold-change<br>BDM-Resistant<br>vs BDM-<br>Sensitive | Gene             | Fold-change<br>BDM-Resistant<br>vs BDM-<br>Sensitive | Gene            | Fold-change<br>BDM-Resistant<br>vs BDM-<br>Sensitive |
|------------------|------------------------------------------------------|------------------|------------------------------------------------------|-----------------|------------------------------------------------------|------------------|------------------------------------------------------|-----------------|------------------------------------------------------|
| <i>LYZ</i>       | 9.553                                                | <i>RGS1</i>      | 2.762                                                | <i>RORA</i>     | 2.220                                                | <i>STAT4</i>     | 2.039                                                | <i>CEBPD</i>    | 1.883                                                |
| <i>S100A8</i>    | 7.514                                                | <i>CYorf15B</i>  | 2.745                                                | <i>CCL3</i>     | 2.217                                                | <i>TNFRSF13B</i> | 2.038                                                | <i>WIPF1</i>    | 1.868                                                |
| <i>S100A9</i>    | 5.511                                                | <i>ITGA4</i>     | 2.725                                                | <i>YPEL2</i>    | 2.211                                                | <i>TSPAN14</i>   | 2.007                                                | <i>RPGR</i>     | 1.860                                                |
| <i>HLA-C</i>     | 5.360                                                | <i>PTPRJ</i>     | 2.708                                                | <i>UTY</i>      | 2.207                                                | <i>DMD</i>       | 2.005                                                | <i>ARRDC3</i>   | 1.858                                                |
| <i>DDX3Y</i>     | 4.589                                                | <i>CASP8</i>     | 2.635                                                | <i>SERPINF1</i> | 2.200                                                | <i>TNFSF9</i>    | 1.991                                                | <i>HOOK1</i>    | 1.847                                                |
| <i>RPS4Y1</i>    | 4.508                                                | <i>GPR183</i>    | 2.621                                                | <i>ZNF608</i>   | 2.148                                                | <i>SNX5</i>      | 1.988                                                | <i>IL8</i>      | 1.845                                                |
| <i>HLA-DQA1</i>  | 4.207                                                | <i>IFI44</i>     | 2.590                                                | <i>ITGAM</i>    | 2.143                                                | <i>ANKRD36B</i>  | 1.984                                                | <i>GPM6A</i>    | 1.839                                                |
| <i>MYADM</i>     | 4.018                                                | <i>GNB4</i>      | 2.481                                                | <i>TAGAP</i>    | 2.138                                                | <i>LRRK2</i>     | 1.981                                                | <i>BCL7A</i>    | 1.833                                                |
| <i>HLA-DRB5</i>  | 3.966                                                | <i>DIP2C</i>     | 2.453                                                | <i>GAS7</i>     | 2.133                                                | <i>ZBTB43</i>    | 1.979                                                | <i>NDST1</i>    | 1.824                                                |
| <i>TNS3</i>      | 3.942                                                | <i>LOC728741</i> | 2.450                                                | <i>C1orf228</i> | 2.132                                                | <i>ID2</i>       | 1.973                                                | <i>C1orf162</i> | 1.823                                                |
| <i>KLF10</i>     | 3.937                                                | <i>HLA-DPB1</i>  | 2.448                                                | <i>BCL2A1</i>   | 2.122                                                | <i>IL15</i>      | 1.971                                                | <i>DDIT3</i>    | 1.822                                                |
| <i>EGR1</i>      | 3.860                                                | <i>CLEC2B</i>    | 2.442                                                | <i>VCAN</i>     | 2.121                                                | <i>MAFB</i>      | 1.968                                                | <i>CNTLN</i>    | 1.815                                                |
| <i>KLRK1</i>     | 3.859                                                | <i>ZNF300</i>    | 2.427                                                | <i>RNF145</i>   | 2.117                                                | <i>TPM3</i>      | 1.966                                                | <i>ZBP1</i>     | 1.803                                                |
| <i>HLA-DQB1</i>  | 3.857                                                | <i>DUSP1</i>     | 2.408                                                | <i>FOSB</i>     | 2.105                                                | <i>APP</i>       | 1.961                                                | <i>TMEM56</i>   | 1.792                                                |
| <i>ANXA1</i>     | 3.784                                                | <i>DUSP6</i>     | 2.404                                                | <i>FKBP5</i>    | 2.103                                                | <i>AIF1</i>      | 1.959                                                | <i>ETV3</i>     | 1.789                                                |
| <i>KIAA1324L</i> | 3.580                                                | <i>C1orf38</i>   | 2.385                                                | <i>SGCE</i>     | 2.090                                                | <i>YES1</i>      | 1.942                                                | <i>STK17B</i>   | 1.789                                                |
| <i>CCL4</i>      | 3.467                                                | <i>ITGAL</i>     | 2.370                                                | <i>DUSP26</i>   | 2.079                                                | <i>DPYD</i>      | 1.932                                                | <i>DUSP10</i>   | 1.788                                                |
| <i>ZNF711</i>    | 3.149                                                | <i>RBMS3</i>     | 2.368                                                | <i>SPTBN1</i>   | 2.070                                                | <i>GOS2</i>      | 1.930                                                | <i>CYorf15A</i> | 1.786                                                |
| <i>FOS</i>       | 3.137                                                | <i>CD1C</i>      | 2.361                                                | <i>ENPP2</i>    | 2.067                                                | <i>DDIT4</i>     | 1.922                                                | <i>TES</i>      | 1.784                                                |
| <i>FCN1</i>      | 3.071                                                | <i>DUSP5</i>     | 2.309                                                | <i>TRPS1</i>    | 2.065                                                | <i>OSBPL3</i>    | 1.908                                                | <i>PPIG</i>     | 1.783                                                |
| <i>LGALS3</i>    | 3.051                                                | <i>USP9Y</i>     | 2.305                                                | <i>PEL11</i>    | 2.056                                                | <i>KLF6</i>      | 1.905                                                | <i>AIM1</i>     | 1.780                                                |
| <i>AHR</i>       | 3.024                                                | <i>SGK1</i>      | 2.298                                                | <i>CRY1</i>     | 2.055                                                | <i>CRYM</i>      | 1.901                                                | <i>RTN4</i>     | 1.768                                                |
| <i>TFEC</i>      | 2.999                                                | <i>CD69</i>      | 2.285                                                | <i>RGS2</i>     | 2.053                                                | <i>BTG1</i>      | 1.894                                                | <i>C6orf114</i> | 1.767                                                |
| <i>KDM5D</i>     | 2.976                                                | <i>MYC</i>       | 2.285                                                | <i>IL1B</i>     | 2.051                                                | <i>KLK1</i>      | 1.894                                                | <i>C17orf91</i> | 1.766                                                |
| <i>PSD3</i>      | 2.831                                                | <i>IFI44L</i>    | 2.281                                                | <i>GADD45B</i>  | 2.049                                                | <i>BCL2</i>      | 1.891                                                | <i>TIMP1</i>    | 1.763                                                |
| <i>EIF1AY</i>    | 2.803                                                | <i>IREB2</i>     | 2.222                                                | <i>EML4</i>     | 2.042                                                | <i>PTPRG</i>     | 1.886                                                |                 |                                                      |

**Supplemental table 3:** List of DEGs between bendamustine-resistant and bendamustine-sensitive CLL cases classified according to the biologic functions encountered by IPA.

| Cellular movement |           | Cell-to-cell signaling and interaction |           | Cellular development |         |           | Cellular growth and proliferation |               |           | Cell death and survival |         |           |
|-------------------|-----------|----------------------------------------|-----------|----------------------|---------|-----------|-----------------------------------|---------------|-----------|-------------------------|---------|-----------|
| ADARB1            | MYADM     | AHR                                    | PPBP      | AHR                  | IGF2BP3 | RORA      | ADARB1                            | FOS           | PTK2      | AHR                     | ID2     | PTPRG     |
| AIF1              | MYC       | ANXA1                                  | PTK2      | AIF1                 | IL15    | SATB1     | AHR                               | GADD45B       | PTPRG     | ANXA1                   | IGF1R   | RAD51C    |
| ANXA1             | NFATC1    | ATM                                    | PTPRJ     | ANXA1                | IL1B    | SERPINF1  | AIF1                              | GLUL          | PTPRJ     | ANXA4                   | IGF2BP3 | RHOB      |
| APP               | PF4       | BCL2A1                                 | RASGRP1   | APP                  | IL2RB   | SERTAD1   | ANXA1                             | HSPA1A/HSPA1B | PTPRS     | APP                     | IL15    | RHOBTB2   |
| ARRDC3            | PIGR      | CCL3                                   | RGS1      | ARRDC3               | IL4R    | SGK1      | APP                               | ID2           | PYHIN1    | ATM                     | IL1B    | RNF144B   |
| BCAR3             | PON2      | CD1C                                   | RHOB      | ATF5                 | IL6ST   | SH3PXD2A  | ARRDC3                            | IGF1R         | RHOB      | BCL2A1                  | IL2RB   | RNF41     |
| BCL2              | PPBP      | CD200                                  | ROCK2     | ATM                  | IL8     | SKI       | ATF5                              | IGF2BP3       | RHOBTB2   | BTG1                    | IL4R    | ROCK2     |
| CCDC88A           | PTK2      | CD86                                   | S100A8    | BATF                 | ITGAM   | SOS1      | ATM                               | IL15          | RNF41     | CAMK2D                  | IL6ST   | RTN4      |
| CCL3              | PTPRJ     | COL4A3                                 | S100A9    | BCAR3                | ITGB1   | SSBP2     | BATF                              | IL1B          | RORA      | CASP8                   | IL8     | S100A8    |
| CD86              | RAB11FIP1 | CTLA4                                  | SELP      | BTG1                 | JUN     | STAT4     | BCAR3                             | IL2RB         | SATB1     | CCL3                    | ITGAL   | S100A9    |
| COL4A3            | RASGRP1   | DDIT4                                  | SERPINF1  | CASP8                | KLF10   | STK38     | BCAT1                             | IL4R          | SERPINF1  | CD22                    | ITGAM   | SATB1     |
| CRY1              | RGS1      | EGR3                                   | SH3PXD2A  | CCL3                 | KLF4    | TCF4      | BCL2                              | IL6ST         | SERTAD1   | CD69                    | ITGB1   | SERPINF1  |
| DIDO1             | RHOB      | FAM65B                                 | TCL1A     | CCNG2                | KLF6    | TCL1A     | BCL2A1                            | IL8           | SGK1      | CD70                    | JUN     | SGK1      |
| DNAJB6            | RNF41     | FCER2                                  | TGFBI     | CD70                 | KLRK1   | TES       | BTG1                              | ITGA4         | SKI       | CEBPD                   | KANK2   | SH3PXD2A  |
| DPYSL2            | ROCK2     | FCGR2A                                 | TIMP1     | CD86                 | LCK     | TIMP1     | CASP8                             | ITGB1         | SLAMF1    | COL4A3                  | KLF4    | SLAMF6    |
| EGR1              | RTN4      | FGFR1                                  | TNFRSF13B | CEBPD                | LGALS3  | TNFRSF13B | CCL3                              | JUN           | SOS1      | CREM                    | KLF6    | SLC37A4   |
| FAM65B            | S100A8    | FOS                                    | TNFRSF17  | COL4A3               | LRRK2   | TNFRSF17  | CCNG2                             | KANK2         | STK38     | CTLA4                   | KLRK1   | SLC7A1    |
| FGFR1             | S100A9    | HSPH1                                  | TNFSF9    | CREM                 | LST1    | TNFSF9    | CD70                              | KLF10         | TCF4      | DDIT3                   | KRT18   | STK17B    |
| FOS               | SATB1     | IGF1R                                  | TYROBP    | CTLA4                | MAFB    | UTS2      | CD86                              | KLF4          | TCL1A     | DDIT4                   | LCK     | STK38     |
| ID2               | SELP      | IL15                                   | VCAN      | DDIT3                | MAP2K6  | VASH1     | CEBPD                             | KLF6          | TES       | DIDO1                   | LGALS3  | SYF2      |
| IGF1R             | SEMA4A    | IL1B                                   | VIPR1     | DIDO1                | MAP4K4  | VCAN      | CLK1                              | KLRK1         | TGFBI     | DPYD                    | LRRK2   | TCF4      |
| IL15              | SERPINF1  | IL2RB                                  |           | DMD                  | MEF2C   |           | COL4A3                            | LCK           | TIMP1     | DUSP1                   | LY86    | TCL1A     |
| IL1B              | SH3PXD2A  | IL4R                                   |           | DUSP1                | MYC     |           | CREM                              | LGALS3        | TNFRSF13B | DUSP10                  | LYZ     | TIMP1     |
| IL8               | SKI       | ITGA4                                  |           | DUSP5                | NFATC1  |           | CTLA4                             | LRRK2         | TNFRSF17  | DUSP22                  | MAP2K6  | TNFRSF13B |
| ITGA4             | SOS1      | ITGAL                                  |           | DUSP6                | NR4A2   |           | DDIT3                             | LST1          | TNFSF9    | DUSP5                   | MAP3K8  | TNFRSF17  |
| ITGAL             | TBXA2R    | ITGAM                                  |           | EGR1                 | PDCD6IP |           | DIDO1                             | LY86          | UTS2      | DUSP6                   | MEF2C   | TNFSF9    |
| ITGAM             | TGFBI     | ITGB1                                  |           | EGR3                 | PF4     |           | DUSP1                             | MAP2K6        | VASH1     | EGR1                    | MYC     | TRPS1     |
| ITGB1             | TIMP1     | KLRK1                                  |           | FCER2                | PPP1R10 |           | DUSP22                            | MAP4K4        | VCAN      | EGR3                    | NFATC1  | WIPF1     |
| JUN               | TNFSF9    | LCK                                    |           | FGFR1                | PTCH1   |           | DUSP5                             | MYC           | VIPR1     | FCER2                   | NR4A2   |           |
| KLF4              | TNS3      | LGALS3                                 |           | FKBP5                | PTK2    |           | DUSP6                             | NFATC1        | WIPF1     | FEM1B                   | PDCD6IP |           |
| KLRC4-KLRK1/KLRK1 | TPM3      | MAP3K8                                 |           | FOS                  | PTPRJ   |           | EGR1                              | NR4A2         |           | FGFR1                   | PF4     |           |
| LCK               | UTS2      | MYADM                                  |           | GADD45B              | PYHIN1  |           | EGR3                              | PDCD6IP       |           | FKBP5                   | PIGR    |           |
| LGALS3            | VASH1     | MYC                                    |           | GAS7                 | RHOB    |           | EIF1AY                            | PF4           |           | FOS                     | PPBP    |           |
| MAP2K6            | VCAN      | PDCD6IP                                |           | HSPA1A               | RHOBTB2 |           | FCER2                             | PPP1R10       |           | G0S2                    | PPP1R10 |           |

|               |              |             |  |              |              |  |              |                 |  |                |                 |
|---------------|--------------|-------------|--|--------------|--------------|--|--------------|-----------------|--|----------------|-----------------|
| <i>MAP3K8</i> | <i>VIPR1</i> | <i>PF4</i>  |  | <i>ID2</i>   | <i>RNF41</i> |  | <i>FGFR1</i> | <i>PPP1R15A</i> |  | <i>GADD45B</i> | <i>PPP1R15A</i> |
| <i>MAP4K4</i> |              | <i>PIGR</i> |  | <i>IGF1R</i> | <i>ROCK2</i> |  | <i>FKBP5</i> | <i>PTCH1</i>    |  | <i>HSPA1A</i>  | <i>PTK2</i>     |



**Supplemental Table 4. List of genes analyzed for validation by qRT-PCR.** 46 genes were selected for its role in the top biological functions encountered by IPA analysis.

| Gene          | p-value              |
|---------------|----------------------|
| <i>AIF1</i>   | * <i>P</i> =0.0148   |
| <i>ANXA1</i>  | <i>P</i> =0.6540     |
| <i>APP</i>    | * <i>P</i> =0.015    |
| <i>BCL2A1</i> | ** <i>P</i> =0.0047  |
| <i>CCL3</i>   | <i>P</i> =0.1890     |
| <i>CCL4</i>   | <i>P</i> =0.3280     |
| <i>CD200</i>  | <i>P</i> =0.5470     |
| <i>CD69</i>   | *** <i>P</i> =0.0002 |
| <i>CRY1</i>   | * <i>P</i> =0.0311   |
| <i>DMD</i>    | <i>P</i> =0.3890     |
| <i>DNAJB6</i> | <i>P</i> =0.5581     |
| <i>DUSP1</i>  | *** <i>P</i> =0.0004 |
| <i>DUSP5</i>  | * <i>P</i> =0.0320   |
| <i>EGR1</i>   | * <i>P</i> =0.0198   |
| <i>FOS</i>    | ** <i>P</i> =0.0048  |
| <i>GADD45</i> | * <i>P</i> =0.0283   |
| <i>GAS7</i>   | <i>P</i> =0.471      |
| <i>HRK</i>    | <i>P</i> =0.228      |
| <i>ID2</i>    | <i>P</i> =0.714      |
| <i>IL15</i>   | <i>P</i> =0.0602     |
| <i>IL1B</i>   | <i>P</i> =0.8460     |
| <i>ITGA4</i>  | <i>P</i> =0.3740     |
| <i>ITGAL</i>  | <i>P</i> =0.1101     |

| Gene             | p-value             |
|------------------|---------------------|
| <i>ITGAM</i>     | ** <i>P</i> =0.0016 |
| <i>KLRC4</i>     | <i>P</i> =0.6260    |
| <i>LCK</i>       | <i>P</i> =0.0594    |
| <i>LGALS3</i>    | * <i>P</i> =0.0176  |
| <i>LRRK2</i>     | <i>P</i> =0.3650    |
| <i>MAFB</i>      | <i>P</i> =0.8370    |
| <i>MEF2C</i>     | <i>P</i> =0.2930    |
| <i>MYC</i>       | <i>P</i> =0.0838    |
| <i>PF4</i>       | <i>P</i> =0.4104    |
| <i>PPBP</i>      | <i>P</i> =0.5990    |
| <i>PTK2</i>      | <i>P</i> =0.2051    |
| <i>RNF144B</i>   | <i>P</i> =0.2220    |
| <i>ROCK2</i>     | <i>P</i> =0.8904    |
| <i>S100A8</i>    | <i>P</i> =0.5390    |
| <i>S100A9</i>    | <i>P</i> =0.4390    |
| <i>SERPINF1</i>  | <i>P</i> =0.1350    |
| <i>SGK1</i>      | <i>P</i> =0.2470    |
| <i>STAT4</i>     | <i>P</i> =0.1075    |
| <i>TCL1A</i>     | <i>P</i> =0.9051    |
| <i>TNFRSF13B</i> | <i>P</i> =0.0680    |
| <i>TNFSF9</i>    | * <i>P</i> =0.0138  |
| <i>VASH1</i>     | <i>P</i> =0.1840    |
| <i>VCAN</i>      | <i>P</i> =0.8007    |

\*, *P*<0.05; \*\*, *P*<0.01; \*\*\*, *P*<0.001.
